# Supplementary material
Source: HighWire-hosted journal article supplement (https://diabetes.diabetesjournals.org/content/suppl/2006/09/27/55.10.2896)
Supplement: PG2896OnlineAppendix1.pdf [file PG2896OnlineAppendix1.pdf]

## Online Supplementary Table 1

### Québec Family Study (QFS)

| INDIVIDUAL | rs9770242<br>PROMOTER | g.-948G>T<br>PROMOTER | rs1319501<br>PROMOTER | g.-295G>C<br>PROMOTER | g.+12464C>G<br>INTRON 4 | rs4730153<br>INTRON 6 | g.+21196delGAT<br>INTRON 6 | rs2302559<br>EXON 7 | g.+23516A>C<br>INTRON 8 | g.+30370A>C<br>INTRON 8 | g.+34284delACATT<br>3'UTR |
|------------|-----------------------|-----------------------|-----------------------|-----------------------|-------------------------|-----------------------|----------------------------|---------------------|-------------------------|-------------------------|---------------------------|
| QFS1       | TT                    | GG                    | AA                    | GG                    | CC                      | CC                    | GAT/GAT                    | GG                  | AA                      | AA                      | ACATT/ACATT               |
| QFS2       | TT                    | GG                    | AA                    | GG                    | CG                      | CT                    | GAT/GAT                    | GG                  | AA                      | AA                      | ACATT/ACATT               |
| QFS3       | GT                    | GG                    | AG                    | GG                    | CC                      | CT                    | GAT/GAT                    | AG                  | AA                      | AA                      | ACATT/ACATT               |
| QFS4       | TT                    | GG                    | AA                    | GG                    | CC                      | CT                    | GAT/GAT                    | AG                  | AA                      | AA                      | ACATT/ACATT               |
| QFS5       | GT                    | GT                    | AG                    | GG                    | CC                      | CT                    | GAT/GAT                    | AG                  | AA                      | AA                      | ACATT/ACATT               |
| QFS6       | TT                    | GG                    | AA                    | GG                    | CC                      | CC                    | GAT/GAT                    | GG                  | AA                      | AA                      | ACATT/ACATT               |
| QFS7       | TT                    | GG                    | AA                    | GG                    | CC                      | CC                    | GAT/GAT                    | GG                  | AA                      | AA                      | ACATT/ACATT               |
| QFS8       | TT                    | GG                    | AA                    | CG                    | CC                      | CC                    | GAT/GAT                    | GG                  | AA                      | AA                      | ACATT/ACATT               |
| QFS9       | GT                    | GG                    | AG                    | GG                    | CC                      | CT                    | GAT/GAT                    | AG                  | AA                      | AA                      | ACATT/ACATT               |
| QFS10      | TT                    | GG                    | AA                    | GG                    | CG                      | CT                    | GAT/GAT                    | GG                  | AA                      | AC                      | ACATT/ACATT               |
| QFS11      | GT                    | GG                    | AG                    | GG                    | CC                      | CT                    | GAT/GAT                    | AG                  | AA                      | AA                      | ACATT/ACATT               |
| QFS12      | NN                    | GG                    | NN                    | GG                    | CC                      | CC                    | GAT/GAT                    | GG                  | AC                      | AA                      | ACATT/ACATT               |
| QFS13      | GT                    | GT                    | AG                    | GG                    | CC                      | CT                    | delGAT/GAT                 | AA                  | AA                      | AA                      | ACATT/ACATT               |
| QFS14      | GT                    | GT                    | AG                    | GG                    | CG                      | TT                    | delGAT/GAT                 | AA                  | AA                      | AA                      | ACATT/ACATT               |
| QFS15      | GT                    | TT                    | AG                    | GG                    | CC                      | CT                    | GAT/GAT                    | AG                  | AA                      | AA                      | ACATT/ACATT               |
| QFS16      | GT                    | GG                    | AG                    | GG                    | CC                      | TT                    | GAT/GAT                    | AA                  | AA                      | AA                      | ACATT/ACATT               |
| QFS17      | TT                    | GG                    | AA                    | GG                    | CC                      | TT                    | GAT/GAT                    | AA                  | AA                      | AA                      | ACATT/ACATT               |
| QFS18      | GG                    | GT                    | GG                    | GG                    | CC                      | TT                    | delGAT/GAT                 | AA                  | AA                      | AA                      | delACATT/ACATT            |

### Saguenay-Lac Saint-Jean (SLSJ)

| INDIVIDUAL |             |             |            |             |             |            |             |             |             |             |             |
|------------|-------------|-------------|------------|-------------|-------------|------------|-------------|-------------|-------------|-------------|-------------|
| SLSJ1      | TT          | GG          | AA         | GG          | CC          | CC         | GAT/GAT     | GG          | AA          | AA          | ACATT/ACATT |
| SLSJ2      | GT          | GT          | AG         | GG          | CC          | CT         | GAT/GAT     | AG          | AA          | AA          | ACATT/ACATT |
| SLSJ3      | TT          | GG          | AA         | GG          | CC          | TT         | GAT/GAT     | AA          | AA          | AA          | ACATT/ACATT |
| SLSJ4      | NN          | GG          | AG         | GG          | CC          | CT         | GAT/GAT     | AG          | AA          | AA          | ACATT/ACATT |
| SLSJ5      | GT          | GT          | AG         | GG          | CC          | TT         | GAT/GAT     | AA          | AA          | NN          | ACATT/ACATT |
| <b>MAF</b> | <b>0.29</b> | <b>0.17</b> | <b>0.3</b> | <b>0.02</b> | <b>0.07</b> | <b>0.5</b> | <b>0.07</b> | <b>0.47</b> | <b>0.02</b> | <b>0.02</b> | <b>0.02</b> |

NN = missing genotype
